# Supplementary material for: Vessel use at the Mycenaean Palace of Ayios Vasileios, Laconia, using Organic Residue Analysis
Source: publisher site journal article supplement (doi:10.1515/pz-2024-2029), 2024-10-28
Supplement: Supplementary file 2 [file Spiteri et al_AV_Suppl Inf 2_Lipid Characteristion_CS_REVISED_18_7_2024.xlsx]

## Sheet: SI2_Table 1_All
Supplementary Information 2: Table listing all of the studied sherds from Ayios Vasileios, including all relevant archaeological information, lipid quantification in µg of lipid per g of sherd,
compounds identified using GC-MS, quantification of the short-chain carboxylic acids in µg of compound per g of sherd carried out on selected internal surfaces of the sherds,
and the compound specific isotope analysis results. Text in red, compounds not present in the solvent extraction, but present after the application of the Garnier and Valamoti (2016) protocol.
Only the samples for which the quantification of the short chain carboxylic fatty acids are reported were extracted following the Garnier and Valamoti (2016) protocol.
(Cx:y: Fatty acid with x carbon atoms and y unsaturations; Cx: Alkane or Alcohol with x carbon atoms; Kx: Ketone with x carbon atoms; WEs: Wax Ester with x carbon atoms)
* Median percentage tartaric acid
Inventory No.	Laboratory Code	Vessel Type	Vessel part tested	Possible conventional function	Ware	Context	Date	Quantification of the TLE (µg/g)	Fatty acids	Diacids	Dihydroxy fatty acids	Monoaclyglycerols	Diacylglycerols	Triacylglycerols	n-alcohols	n-alkanes	Sterols	Ketones	Wax esters	Short-chain carboxylic compounds (quantification µg/g) in the internal surface							δ13C16:0	δ13C18:0	Δ13C
																				Succinic acid	Fumaric acid	Malic acid	Tartaric acid	Citric acid	Syringic acid	Median % TA*
1	AV-001	Carinated kylix	Wall sherd (lower part of vessel)	Drinking/eating	Fine plain	Building Β (Ι18α)_Room 6_Group 6172	LH IIIA2 (Late 14th cent.)	6.4	C10:0, C12:0, C14:0, C15:0, C16:1, C16:0, C17:0br, C17:0, C18:1, C18:0, C20:0	-	-	-	-	-	C12, C16, C18, C22	C17, C18	Cholsterol, β-sitosterol	K31	-	0	0	0	0	0	0		-29.7	-29.2	0.5
2	AV-002	Kylix	Wall sherd (lower part of vessel)	Drinking/eating	Fine plain	Building Β (Ι18α)_Room 6_Group 6172	LH IIIA2 (Late 14th cent.)	neg.	C11:0, C12:0, C14:0, C16:0, C18:0	-	-	-	-	-	-	C16, C18, C20	Cholesterol	K31, K33	-	0	0	0	0	0	0
3	AV-003	Rounded Kylix	Rim	Drinking/eating	Fine plain	Building Β (Ι18α)_Room 6_Group 6276	LH IIIA2 (Late 14th cent.)	neg.	-	-	-	-	-	-	-	C18, C20	Cholesterol	K31	-
4	AV-004	Dipper	Wall sherd	Ladle/serving	Fine plain	Building Β (Ι18α)_Room 6_Group 6314	LH IIIA2 (Late 14th cent.)	neg.	C12:0, C13:0, C14:0, C15:0br, C15:0, C16:0, C18:0	-	-	-	-	-	C28	C18, C19, C20	Cholesterol	K31, K33	-	0	0	0	0	0	0
5	AV-005	Rounded Kylix	Rim	Drinking/eating	Fine plain	Building Β (Ι18α)_Room 6_ Group 6140	LH IIIA2 (Late 14th cent.)	neg.	-	-	-	1-16:0	-	-	C14, C16, C18	C17, C18, C20, C22	Cholesterol, β-sitosterol	K31, K33	-
6	AV-006	Basin/tub	Wall sherd, close to rim	Storage? Solid product?	Medium coarse ware	Building Β (Ι18α)_Fill above Road to the east of Room 6_ Group 6191	LH IIIA2 (Late 14th cent.)	neg.	-	-	-	-	-	-	-	C17, C33	Cholesterol	-	-	0	0	0.01	0	0	0	0
7	AV-007	Kylix	Stem and wall sherd	Drinking/eating	Fine plain	Building Β (Ι18α)_Road to the East of Room 6 Group 6247_lowest pebbled surface	LH IIIA1 (Early 14th cent.)	neg.	-	-	-	-	-	-	-	C12, C15, C17, C18, C33	Cholesterol	K31, K33	-	0	0	0.01	0	0	0	0
10	AV-010	Cooking tripod	Rim and base	Cooking	Medium coarse cooking ware (Kytheran import)	Building Β (Ι18α)_Room 6_Group 6172	LH IIIA2 (Late 14th cent.)	neg.	-	-	-	-	-	-	C18	C18, C20, C33	Cholesterol, β-sitosterol	K31, K33	-
11	AV-011	Wide-mouthed jar (handmade, burnished)	Wall sherd	Storage/preparation	Handmade burnished ware	Above Court_ Levelling layer (Trench Ε11β) Group 1842	LH IIIC (Early 12th cent.)	10.5	C12:0, C14:0, C15:0, C16:1, C16:0, C17:0, C18:1, C18:0	Adipic (C6), Pimelic (C7), Suberic (C8)	-	1-16:0	-	-	C12, C14, C18	C18, C21, , C23, C24, C25, C33, C37, C38, C39	Cholesterol, β-sitosterol	K31, K33	-	0.1	0.1	0.7	0.7	0	0	50	-29.4	-29.5	-0.1
12	AV-012	Wide-mouthed jar (handmade, burnished)	Wall sherd	Storage/preparation	Handmade burnished ware	Above Court_Levelling layer (Δ13β) Group 1070	LH IIIC (Early 12th cent.)	41.8	C8:0, C9:0, C10:0, , C11:0, C12:0, C13:0, C14:0, C15:0br, C15:0, C16:1, C16:0, C17:0br, C17:0, C18:1, C18:0, C20:0, C21:0, C22:0, C23:0, C24:0, C25:0, C26:0, C27:0, C28:0, C29:0, C30:0, C31:0, C32:0, C34:0, C36:0	Adipic (C6), Pimelic (C7), Suberic (C8), Azelaic (C9)	-	1-16:0	-	-	C12, C14, C16, C18, C20, C24, C26, C28, C30, C32, C34, C36	C24, C26, C27, C28, C29, C30, C31, C33	β-sitosterol	-	Palmitate: WE40, WE42, WE44, WE46, WE48, WE50	0.2	0.1	0.1	0	0	0	0
13	AV-013	Wide-mouthed jar (handmade, burnished)	Rim sherd	Storage/preparation	Handmade burnished ware	Settlement deposit close to the early Mycenaean cemetery Group 948	LH IIIC (Early 12th cent.)	neg.	C12:0, C14:0, C15:0, C16:0, C18:1, C18:0	Adipic (C6), Pimelic (C7), Suberic (C8), Azelaic (C9), Sebacic (C10)	-	1-16:0, 1-18:0	1,3-30:0, 1,3-32:0	-	C14, C16, C18, C20, C22, C26, C28, C30.	C17, C20, C21, C24, C25, C26, C27, C28, C29, C30, C31, C35	Cholesterol, β-sitosterol	K31, K33	-	0.04	0.001	0.3	0	0	0	0
1	AV2-001	Cup	Rim/base	Eating/drinking	Fine plain	SE Deposit (Trench Β15δ)_Group 768 (DB613)	LH IIIA2 Middle (Middle 14th cent.)	13	C9:0, C10:0, C12:0, C13:0, C14:0, C15:0br, C15:0, C16:0, C17:0, C18:2, C18:1, C18:0, C20:0, C22:0	Adipic (C6)	-	1-16:0, 1-18:0	-	-	C14, C15, C16, C18	C18, C19, C20, C21, C23, C32	Cholesterol, β-sitosterol	-	-	0	0	0.2	0.01	0	0	4.7619	-28.9	-29.4	-0.5
2	AV2-002	Goblet/kylix	Rim	Drinking/eating	Fine plain	SE Deposit (Trench Β15δ)_Group 768	LH IIIA2 Middle (Middle 14th cent.)	6.8	C11:0, C12:0, C13:0, C14:1, C14:0, C15:0br, C15:0, C16:0, C17:0, C18:1, C18:0, C20:0	-	-	1-16:0	-	-	C12, C14, C15, C16, C20, C22	C19, C20, C21, C23, C25, C27, C29	Cholesterol, β-sitosterol	K31, K33	-	0	0	trace	0	0	0		-30	-29.8	0.2
3	AV2-003	Goblet	Rim	Drinking/eating	Fine plain	SE Deposit (Trench Β15δ)_Group 768 (DB473)	LH IIIA2 Middle (Middle 14th cent.)	7.8	C9:0, C12:0, C14:0, C15:0, C16:1, C16:0, C17:0br, C17:0, C18:1, C18:0, C20:0, C24:0	-	-	1-14:0, 1-16:1, 1-16:0	-	-	C12, C14, C15, C16, C18, C22, C24	C18, C19, C20, C23, C24, C25, C28, C32	Cholesterol	K31, K33	-	0	0	0.005	0	0	0	0	-28.8	-29.5	-0.7
4	AV2-004	Rounded Kylix	Rim	Drinking/eating	Fine plain	SE Deposit (Trench Β15δ)_Group 763 (DB1832)	LH IIIA2 Middle (Middle 14th cent.)	neg.	C16:0	-	-	1-16:0, 1-18:0	-	-	C12, C14, C16, C18, C24, C26, C28	C17, C18, C19, C20, C21, C28, C32	Cholesterol, Stigmasterol, β-sitosterol	K33	-
5	AV2-005	Rounded Kylix	Rim	Drinking/eating	Fine plain	SE Deposit (Trench Β15δ)_Group 776 (DB393)	LH IIIA2 Middle (Middle 14th cent.)	neg.	C14:0, C16:1, C16:0, C17:0, C18:1, C18:0	-	9,10-dihydroxyoctadecanoic acid	1-16:0, 1-18:0	-	-	C12, C14, C16, C18	C18, C20, C32	Cholesterol, β-sitosterol	-	-
6	AV2-006	Rounded Kylix	Rim	Drinking/eating	Fine plain	SE Deposit (Trench Β15δ)_Group 768 (DB514)	LH IIIA2 Middle (Middle 14th cent.)	neg.	C15:0, C16:0	-	-	1-16:0	-	-	C14, C15, C16, C18, C28	C20, C21, C22, C27, C28, C32	Cholesterol, β-sitosterol	K31, K33, K35	-
7	AV2-007	Rounded Kylix	Rim	Drinking/eating	Fine painted	SE Deposit (Trench Β15δ)_Group 768 (DB521)	LH IIIA2 Middle (Middle 14th cent.)	neg.	C16:0, C18:1, C18:0	-	-	1-16:0, 1-18:1, 1-18:0	-	-	C12, C14, C15, C16, C18	C20, C32	Cholesterol, β-sitosterol	K31	-
8	AV2-008	Carinated kylix	Rim	Drinking/eating	Fine plain	SE Deposit (Trench Β15δ)_Group 763 (DB1828)	LH IIIA2 Middle (Middle 14th cent.)	neg.	-	-	-	1-16:0	-	-	C12, C14, C16, C18	C18, C20, C28, C32	Cholesterol, Stigmasterol, β-sitosterol	K31, K33	-
9	AV2-009	Carinated kylix	Rim	Drinking/eating	Fine plain	SE Deposit (Trench Β15δ)_Group 768 (DB516)	LH IIIA2 Middle (Middle 14th cent.)	neg.	C16:0, C17:0, C18:1, C18:0	-	-	1-16:0, 1-18:0	-	-	C12, C14, C15, C16, C18, C24	C18, C19, C20, C27, C32	Cholesterol, Stigmasterol, β-sitosterol	K31, K33	-
10	AV2-010	Carinated kylix	Rim	Drinking/eating	Fine plain	SE Deposit (Trench Β15δ)_Group 763 (DB1829)	LH IIIA2 Middle (Middle 14th cent.)	neg.	C16:0, C18:1, C18:0	-	-	1-16:0	-	-	C14, C15, C16	C32, C35	Cholesterol, β-sitosterol	K31	-
11	AV2-011	Carinated kylix	Wall sherd	Drinking/eating	Fine plain	SE Deposit (Trench Β15δ)_Group 769 (DB105)	LH IIIA2 Middle (Middle 14th cent.)	neg.	C11:0, C12:0, C14:0, C15:0br, C15:0, C16:0, C17:0br, C17:0, C18:1, C18:0, C20:0	Adipic (C6), Suberic (C8), Azelaic (C9)	-	-	-	-	C12, C14, C15, C16, C18, C28	C18, C20, C21, C27, C28, C32	Cholesterol, Stigmasterol, β-sitosterol	K31, K33	-	0	0	0.02	0.05	0	0	71.4286
12	AV2-012	Carinated kylix	Rim	Drinking/eating	Fine plain	SE Deposit (Trench Β15δ)_Group 763 (DB1824)	LH IIIA2 Middle (Middle 14th cent.)	neg.	C16:0, C17:0, C18:1, C18:0	-	-	1-16:0, 1-18:0	-	-	C14, C15, C16, C18	C18, C20, C32	Cholesterol, β-sitosterol	-	-
13	AV2-013	Goblet	Wall sherd	Drinking/eating	Fine plain	SE Deposit (Trench Β15δ)_Group 773 (DB107)	LH IIIA2 Middle (Middle 14th cent.)	10.5	C12:0, C13:0, C14:0, C15:0br, C15:0, C16:0, C17:0, C18:1, C18:0, C20:0, C22:0, C24:0	-	-	1-16:0, 1-18:0	-	-	C12, C14, C16, C18, C22, C24	C18, C20, C32	Cholesterol, β-sitosterol, γ-Sitostenone	K31	-	0.002	0	0.01	0.03	0	0	75	-29.6	-29.5	0.1
14	AV2-014	Kylix	Base	Drinking/eating	Fine plain	SE Deposit (Trench Β15δ)_Group 779 (DB20)	LH IIIA2 Middle (Middle 14th cent.)	11.1	C12:0, C14:0, C15:0br, C15:0, C16:0, C17:0, C18:1, C18:0, C20:0, C22:0, C24:0	Adipic (C6), Suberic (C8), Azelaic (C9)	-	1-16:0	-	-	C16, C18	C33	Cholesterol, β-sitosterol, γ-Sitostenone	-	-	0	0	0.01	0.02	0	0	66.6667	-29.7	-29.6	0.1
15	AV2-015	Rounded Kylix	Rim	Drinking/eating	Fine plain	SE Deposit (Trench Β15δ)_Group 763 (DB1835)	LH IIIA2 Middle (Middle 14th cent.)	neg.	C16:0, C18:1, C18:0	-	-	1-16:0, 1-18:0	-	-	C12, C14, C15, C16, C18, C26, C28	C17, C18, C19, C20, C21, C27, C28, C32	Cholesterol, β-sitosterol	K31, K33	-
16	AV2-016	Goblet	Rim	Drinking/eating	Fine plain	SE Deposit (Trench Β15δ)_Group 769 (DB421)	LH IIIA2 Middle (Middle 14th cent.)	neg.	C16:0, C17:0, C18:1, C18:0	-	-	-	-	-	C12, C13, C14, C15, C16, C18, C26, C28	C18, C20, C27, C28, C32	Cholesterol, Stigmasterol, β-sitosterol	K31, K33	-
17	AV2-017	Carinated kylix	Rim	Drinking/eating	Fine plain	SE Deposit (Trench Β15δ)_Group 768 (DB520)	LH IIIA2 Middle (Middle 14th cent.)	neg.	C16:0, C18:1, C18:0	-	-	1-18:0	-	-	C15, C16, C18, C28	C20, C24, C28, C32	Cholesterol, Stigmasterol, β-sitosterol	K31, K33	-
18	AV2-018	Krater	Wall sherd	Mixing	Fine plain	SE Deposit (Trench Β15δ)_Group 768 (DB612)	LH IIIA2 Middle (Middle 14th cent.)	neg.	C12:0, C14:0, C15:0br, C15:0, C16:1, C16:0, C18:1, C18:0, C20:0, C22:0, C24:0	Azelaic (C9)	-	-	-	-	C12, C14, C15, C18	C18, C19, C20, C21, C31	-	-	-	0.004	0	0.09	0.09	0	0	50
19	AV2-019	Goblet	Wall sherd	Drinking/eating	Fine plain	SE Deposit (Trench Β15δ)_Group 779 (DB20)	LH IIIA2 Middle (Middle 14th cent.)	neg.	C12:0, C13:0, C14:0, C15:0, C16:0, C18:1, C18:0, C20:0	-	-	1-18:0	-	-	C12, C14, C15, C16, C18	C18, C20	Cholesterol, β-sitosterol	-	-	0.01	0	0.05	0	0	0	0
20	AV2-020	Goblet	Stem	Drinking/eating	Fine plain	SE Deposit (Trench Β15δ)_Group 779 (DB20)	LH IIIA2 Middle (Middle 14th cent.)	neg.	C12:0, C13:0, C14:0, C16:0, C18:0	-	-	-	-	-	C18	C18, C20	-	-	-	0.02	0	0.11	0.09	0	0	45
21	AV2-021	Angular bowl	Rim/Base	Serving	Fine plain	SE Deposit (Trench Β15δ)_Group 768 (DB1827)	LH IIIA2 Middle (Middle 14th cent.)	neg.	C12:0, C13:0, C14:0, C15:0, C16:0, C17:0, C18:1, C18:0	-	-	1-16:0, 1-18:0	-	-	C12, C14, C15, C16, C18, C22, C26	C18, C19, C27, C28, C32	Cholesterol, β-sitosterol	-	-	0.04	0	0.11	0	0	0	0
22	AV2-022	Angular bowl	Rim	Serving	Fine plain	SE Deposit (Trench Β15δ)_Group 763 (DB1830)	LH IIIA2 Middle (Middle 14th cent.)	neg.	C12:0, C16:0, C17:0, C18:1, C18:0	-	-	1-16:0	-	-	C12, C13, C14, C15, C16, C18, C20	C20, C21	Cholesterol, Stigmasterol, β-sitosterol	-	-
23	AV2-023	Angular bowl	Rim	Serving	Fine plain	SE Deposit (Trench Β15δ)_Group 763 (DB1821)	LH IIIA2 Middle (Middle 14th cent.)	neg.	C16:0, C18:1, C18:0	-	-	1-16:0, 1-18:0	-	-	C14, C15, C16, C18, C20, C22, C26	C20	Cholesterol, β-sitosterol	-	-
24	AV2-024	Angular bowl	Rim	Serving	Fine plain	SE Deposit (Trench Β15δ)_Group 763 (DB1841)	LH IIIA2 Middle (Middle 14th cent.)	neg.	C9:0, C10:0, C12:0, C13:0, C16:0, C18:1, C18:0	-	-	1-16:0, 1-18:0	-	-	C12, C15, C16, C18, C20, C22, C24, C26, C28, C32	C18, C20, C25, C27, C28, C30, C31, C32	β-sitosterol	-	-
25	AV2-025	Conical cup	Rim/Base	Drinking/eating	Fine plain	SE Deposit (Trench Β15δ)_Group 768 (DB103)	LH IIIA2 Middle (Middle 14th cent.)	neg.	C12:0, C13:0, C14:0, C15:0, C16:0, C18:0, C20:0	Adipic (C6)	-	1-16:0, 1-18:0	-	-	C16, C18	C22	β-sitosterol, γ-Sitostenone	-	-	0.1	0	0.2	0	0	0	0
26	AV2-026	Conical cup	Rim	Drinking/eating	Fine plain	SE Deposit (Trench Β15δ)_Group 763 (DB1826)	LH IIIA2 Middle (Middle 14th cent.)	neg.	C16:0	-	-	1-16:0, 1-18:0	-	-	C16, C18, C20, C26	C20, C27, C29	Cholesterol, β-sitosterol	K31	-
27	AV2-027	Conical cup	Rim	Drinking/eating	Fine plain	SE Deposit (Trench Β15δ)_Group 763 (DB1831)	LH IIIA2 Middle (Middle 14th cent.)	neg.	-	-	-	1-16:0, 1-18:0	-	-	C14, C16, C18, C20, C28	C18, C21, C27, C28, C32	Cholesterol, Stigmasterol, β-sitosterol	K31	-
28	AV2-028	Conical cup	Rim/Base	Drinking/eating	Fine plain	SE Deposit (Trench Β15δ)_Group 763 (DB1837)	LH IIIA2 Middle (Middle 14th cent.)	neg.	C12:0, C14:0, C15:0, C16:0, C18:0, C20:0	-	-	1-18:0	-	-	C16, C18	C20, C32	Cholesterol, β-sitosterol	K31	-	0.01	0	0.03	0	0	0	0
29	AV2-029	Conical cup	Base	Drinking/eating	Fine plain	SE Deposit (Trench Β15δ)_Group 763 (DB1838)	LH IIIA2 Middle (Middle 14th cent.)	neg.	C12:0, C14:0, C15:0, C16:0, C17:0, C18:1, C18:0, C19:0, C20:0, C23:0, C24:0, C26:0	Pimelic (C7), Suberic (C8), Azelaic (C9)	-	-	-	-	C12, C16, C18	C32	Cholesterol, β-sitosterol	K31	-	0	0	0.02	0.07	0	0	77.7778
30	AV2-030	Conical cup	Rim	Drinking/eating	Fine plain	SE Deposit (Trench Β15δ)_Group 763 (DB1834)	LH IIIA2 Middle (Middle 14th cent.)	neg.	-	-	-	1-16:0	-	-	C12, C14, C15, C16, C18	C23, C26, C28	Cholesterol, Stigmasterol, β-sitosterol	K31, K33	-
31	AV2-031	Conical cup	Rim/Base	Drinking/eating	Fine plain	SE Deposit (Trench Β15δ)_Group 763 (DB1833)	LH IIIA2 Middle (Middle 14th cent.)	neg.	C12:0, C13:0, C14:0, C15:0, C16:0, C18:0	-	-	1-16:0, 1-18:0	-	-	C12, C14, C15, C16, C18, C24	C20, C24, C25, C28, C30, C32	Cholesterol, β-sitosterol	K31, K33	-	0	0	0	0	0	0
32	AV2-032	Goblet	Base	Drinking/eating	Fine painted	SE Deposit (Trench Β15δ)_Group 762 (DB1825)	LH IIIA2 Middle (Middle 14th cent.)	neg.	C10:0, C11:0, C12:0, C16:0, C18:0	-	-	1-16:0, 1-18:0	-	-	C11, C12, C13, C14, C15, C16, C18	C18, C19, C20, C21, C22, C28, C32	Cholesterol, β-sitosterol	-	-	0	0	0.03	0.03	0	0	50
33	AV2-033	Goblet	Base	Drinking/eating	Fine painted	SE Deposit (Trench Β15δ)_Group 770 (DB1840)	LH IIIA2 Middle (Middle 14th cent.)	neg.	C12:0, C14:0, C15:0, C16:0, C17:0, C18:0, C20:0, C24:0	-	-	1-16:0, 1-18:0	-	-	C12, C14, C15, C16, C18, C20	C20, C21, C22, C28, C32	Cholesterol, β-sitosterol	-	-	0.0004	0	0.01	0.01	0	0	50
34	AV2-034	Goblet	Base	Drinking/eating	Fine painted	SE Deposit (Trench Β15δ)_Group 773 (DB61)	LH IIIA2 Middle (Middle 14th cent.)	neg.	C12:0, C14:0, C15:0, C16:0, C18:0, C20:0	Adipic (C6), Suberic (C8), Azelaic (C9)	-	-	-	-	C12, C13, C14, C15, C16, C18	C18, C20, C21, C23, C32	Cholesterol, β-sitosterol	-	-	0	0	0.01	0.06	0	0	85.7143
35	AV2-035	Dipper	Rim	Ladle/serving	Fine painted	SE Deposit (Trench Β15δ)_Group 769 (DB444)	LH IIIA2 Middle (Middle 14th cent.)	neg.	-	-	-	1-16:0, 1-18:0	-	-	C12, C14, C15, C16, C18, C20	C18, C20, C27, C32	Cholesterol, β-sitosterol	K31, K33	-
36	AV2-036	Rounded Kylix	Rim	Drinking/eating	Fine painted	SE Deposit (Trench Β15δ)_Group 773 (DB60)	LH IIIA2 Middle (Middle 14th cent.)	neg.	C16:0, C18:1, C18:0	-	-	1-16:0	-	-	C12, C13, C14, C15, C16, C18, C20, C21, C22, C24, C26, C28	C20, C23, C25, C27, C29, C31, C32	β-sitosterol	K31	-
37	AV2-037	Rounded Kylix	Wall sherd	Drinking/eating	Fine painted	SE Deposit (Trench Β15δ)_Group 763 (DΒ1820)	LH IIIA2 Middle (Middle 14th cent.)	neg.	C12:0, C13:0, C14:0, C15:0, C16:0, C18:0, C20:0	-	-	1-16:0	-	-	C12, C14, C16, C18, C20	C18, C22, C25, C27, C28, C32	Cholesterol, β-sitosterol, γ-Sitostenone	K31, K33	-	0	0	0.01	0.02	0	0	66.6667
38	AV2-038	Rounded Kylix	Rim	Drinking/eating	Fine painted	SE Deposit (Trench Β15δ)_Group 757 (DB49)	LH IIIA2 Middle (Middle 14th cent.)	neg.	C16:0, C18:0	-	-	1-16:0, 1-18:0	-	-	C12, C13, C14, C15, C16, C18, C20, C22, C24	C18, C19, C20, C23, C25, C26, C27, C29, C32	Cholesterol, β-sitosterol	-	-
39	AV2-039	Dipper	Rim	Ladle/serving	Fine painted	SE Deposit (Trench Β15δ)_Group 763 (DB1836)	LH IIIA2 Middle (Middle 14th cent.)	neg.	C18:0	-	-	1-16:0, 1-18:0	-	-	C12, C14, C15, C16, C17, C18, C20, C24, C26	C18, C20, C21, C26, C27, C29, C30, C32	Cholesterol, Stigmasterol, β-sitosterol	K31, K33	-
40	AV2-040	Rounded Kylix	Rim	Drinking/eating	Fine plain	SE Deposit (Trench Β15δ)_Group 768 (DB32)	LH IIIA2 Middle (Middle 14th cent.)	10.5	C9:0, C10:0, C12:0, C14:0, C16:0, C17:0br, C17:0, C18:1, C18:0, C19:0, C20:0, C21:0, C22:0, C23:0, C24:0, C25:0, C26:0	-	-	1-16:0, 1-18:0	1,3-30:0, 1,2-32:0, 1,3-32:0, 1,2-34:0, 1,3-34:0, 1,2-36:0, 1,3-36:0	-	C12, C13, C14, C15, C17, C18, C20, C24, C26, C28, C30	C18, C19, C22, C24, C27, C29, C23	Cholesterol, Cholestan-3-ol, β-sitosterol	K31, K33, K35	Palmitate & Stearate: WE46, WE48, WE50	0.02	0.03	0.02	0	0	0	0
42	AV2-042	Rhyton	Wall sherd	Libation	Fine painted	SE Deposit (Trench Β15δ)_Group 768	LH IIIA2 Middle (Middle 14th cent.)	neg.	C11:0, C12:0, C13:0, C14:0, C15:0br, C15:0, C16:1, C16:0, C24:0, C25:0	-	-	1-16:0, 1-18:0	-	-	C12, C14, C15, C16, C17, C18, C20	C20, C22	Cholesterol, 7-Ketocholesterol	K31, K33	-	0	0	0.005	trace	0.005	0
43	AV2-043	Amphora	Wall sherd	Storage/serving	Fine plain	SE Deposit (Trench Β15δ)_Group 763	LH IIIA2 Middle (Middle 14th cent.)	neg.	C12:0, C13:0, C14:0, C15:0, C16:0	-	-	1-16:0	-	-	C16, C17, C18	C17, C18, C20, C23, C24	Cholesterol, β-sitosterol	-	-	0	0	0	0	0	0
44	AV2-044	Conical Cup	Rim/Base	Drinking/eating	Fine plain	SE Deposit (Trench Β15δ)_Group 770 (DB1822)	LH IIIA2 Middle (Middle 14th cent.)	neg.	C16:0, C18:1, C18:0	-	-	1-16:0, 1-18:0	-	-	C14, C15, C16, C18	C18, C19, C20, C21, C22, C32	Cholesterol, β-sitosterol	-	-
45	AV2-045	Askos	Wall sherd	Pouring (ritual?), storage	Fine plain	SE Deposit (Trench Β15δ)_Group 779 (DB382)	LH IIIA2 Middle (Middle 14th cent.)	neg.	C11:0, C12:0, C130, C14:0, C15:0, C16:0, C17:0, C18:2, C18:1, C18:0, C20:0, C22:0, C24:0	Azelaic (C9)	-	1-16:0, 1-18:0	-	-	C13, C14, C15, C16, C18, C22, C23, C24, C25, C26	C18, C19, C20, C21, C27, C29, C32	Cholesterol, β-sitosterol	-	-	0.009	0	0.1	0	0	0	0
46	AV2-046	Cooking tripod	Leg/Base	Cooking	Medium coarse cooking ware	SE Deposit (Trench Β15δ)_Group 779 (DB1842)	LH IIIA2 Middle (Middle 14th cent.)	neg.	C11:0	-	-	1-16:0, 1-18:0	-	-	C14, C15, C16, C17, C18	C20, C32	Cholesterol, β-sitosterol	-	-
47	AV2-047	Cooking pot	Rim	Cooking	Medium coarse cooking ware	SE Deposit (Trench Β15δ)_Group 770 (DB1839)	LH IIIA2 Middle (Middle 14th cent.)	15.6	C9:0, C12:0, C13:0, C14:0, C15:0, C16:0, C17:0, C18:1, C18:0, C19:0, C20:0 C21:0, C22:0, C23:0, C24:0, C25:0, C26:0, C27:0. C28:0, C29:0, C32:0	Pimelic (C7), Suberic (C8), Azelaic (C9)	-	1-16:0, 1-18:0	1,2-30:0, 1,3-30:0, 1,2-32:0, 1,3-32:0, 1,2-34:0, 1,3-34:0, 1,2-36:0, 1,3-36:0	44:0, 46:0, 48:0, 50:0, 52:0	C12, C14, C16, C18, C25	C17, C18, C19, C20, C21, C27, C29, C32	Cholesterol	K31, K33, K35	-	0.07	trace	0.1	0	0	0	0
48	AV2-048	Brazier	Rim/Base	Cooking utensil	Medium coarse cooking ware	SE Deposit (Trench Β15δ)_Group 779 (DB380)	LH IIIA2 Middle (Middle 14th cent.)	neg.	C11:0, C12:0, C14:0, C16:0, C17:0, C18:0, C20:0, C24:0, C26:0	Adipic (C6), Suberic (C8), Azelaic (C9)	-	1-16:0, 1-18:0	-	-	C14, C15, C16, C17, C18, C26, C28	C18, C19, C20, C27, C28, C31, C32	Cholesterol, β-sitosterol	-	-	0.04	0.1	0.5	0.1	0	0	16.6667
49	AV2-049	Cooking pot	Rim	Cooking?	Medium coarse cooking ware	SE Deposit (Trench Β15δ)_Group 779 (DB379)	LH IIIA2 Middle (Middle 14th cent.)	neg.	C14:0, C15:0, C16:0, C17:0, C18:0, C20:0, C24:0, C26:0, C27:0, C28:0, C29:0, C30:0	-	-	1-16:0, 1-18:0	-	-	C16, C18, C22	C19, C20, C21, C22, C28, C33	Cholesterol, β-sitosterol	-	-	0	0	0.03	0	0	0	0
50	AV2-050	Cooking Tray	Wall sherd	Cooking	Medium coarse cooking ware	SE Deposit (Trench Β15δ)_Group 763 (DB1823)	LH IIIA2 Middle (Middle 14th cent.)	neg.	C12:0, C15:0, C16:0, C17:0, C18:1, C18:0, C19:0, C20:0, C22:0, C23:0, C24:0	-	-	1-16:0, 1-18:0	1,3-30:0, 1,2-32:0, 1,3-32:0, 1,2-34:0, 1,3-34:0, 1,2-36:0, 1,3-36:0	44:0, 46:0, 48:0, 50:0, 52:0	C18	C18, C19, C20, C22, C29, C32	Cholesterol, β-sitosterol	K29, K31, K33	-
51	AV2-051	Lamp	Rim	Utensil	Medium coarse cooking ware	SE Deposit (Trench Β15δ)_Group 763 (DB1818)	LH IIIA2 Middle (Middle 14th cent.)	23.7	C16:0, C18:0, C19:0, C20:0, C21:0, C22:0, C23:0, C24:0, C25:0, C26:0	-	-	-	-	-	-	-	-	-	-
52	AV2-052	Cooking tripod	Base	Cooking	Medium coarse cooking ware	SE Deposit (Trench Β15δ)_Group 763 (DB1843)	LH IIIA2 Middle (Middle 14th cent.)	25.2	C9:0, C12:0, C14:0, C15:0, C16:0, C17:0, C18:0, C20:0	-	-	1-16:0, 1-18:0	1,2-30:0, 1,3-30:0, 1,2-32:0, 1,3-32:0, 1,2-34:0, 1,3-34:0, 1,2-36:0, 1,3-36:0	44:0, 46:0, 48:0, 50:0, 52:0	C12, C16, C18	C18, C19, C20, C25, C32	Cholesterol, β-sitosterol	K29, K33, K35	-	0	0	0.02	0	0	0	0
53	AV2-053	Cooking pot	Rim	Cooking	Medium coarse cooking ware	SE Deposit (Trench Β15δ)_Group 768 (DB654)	LH IIIA2 Middle (Middle 14th cent.)	25.3	C12:0, C14:0, C15:0, C16:0, C17:0, C18:1, C18:0, C20:0, c21:0, C22:0, C23:0, C24:0, C25:0, C26:0, C28:0	Pimelic (C7), Suberic (C8), Azelaic (C9)	13,14-dihydroxydocosanoic acid;	2-16:0, 1-16:0, 1-18:1, 1-18:0, 1-20:0	1,2-30:0, 1,3-30:0, 1,2-32:0, 1,3-32:0, 1,2-34:0, 1,3-34:0, 1,2-36:0, 1,3-36:0	48:0, 50:0, 52:0, 54:0	C12, C16, C18, C26, C28, C30	C17, C20, C27, C28, C31, C32, C33	-	K31	-	0.004	0	0.06	0	0	0	0	-26.4	-25.5	0.9
54	AV2-054	Amphora/jug	Base	Storage/serving	Medium coarse painted ware	SE Deposit (Trench Β15δ)_Group 768 (DB655)	LH IIIA2 Middle (Middle 14th cent.)	neg.	C12:0, C15:0, C16:0, C17:0, C18:1, C18:0	-	-	1-16:0, 1-18:0	-	-	C15, C16, C18, C20, C22	C18, C19, C20, C22, C29, C32	Cholesterol, β-sitosterol	-	-	0	0	0	0	0	0
55	AV2-055	Cooking vessel	Rim	Cooking	Medium coarse cooking ware (import?)	SE Deposit (Trench Β15δ)_Group 768, 765 (DB657)	LH IIIA2 Middle (Middle 14th cent.)	neg.	C16:0, C18:0	-	-	1-16:0, 1-18:0	-	-	C18	C18, C32	Cholesterol	-	-	0	0	0.03	0	0	0	0
56	AV2-056	Amphora/jug	Base	Storage/serving	Medium coarse micaceous (Kythera)	SE Deposit (Trench Β15δ)_Group 779 (DB387)	LH IIIA2 Middle (Middle 14th cent.)	neg.	C12:0, C14:0, C15:0, C16:0, C17:0, C18:1, C18:0	Pimelic (C7), Suberic (C8), Azelaic (C9)	-	1-18:0	-	-	C14, C15, C16, C18, C20	C18, C20, C24, C28, C32	-	-	-	0	0	0.1	0	0	0	0
58	AV2-058	Carinated kylix	Wall sherd	Drinking/eating	Fine plain	West Stoa_Floor (Trench Δ11)_Group 7148 (DB 611)	LH IIIB Middle (Middle 13th cent.)	neg.	C12:0, C14:0, C16:1, C16:0, C18:1, C18:0	-	-	1-18:1, 1-18:0	-	-	C14, C16, C18, C20, C22	C20, C32, C33	Cholesterol	-	-	0	0	0	0	0	0
59	AV2-059	Cup	Base	Drinking/eating	Fine plain	West Stoa_Floor (Trench Δ11)_Group 7148 (DB 602)	LH IIIB Middle (Middle 13th cent.)	neg.	C12:0, C14:0, C16:0, C18:0, C20:0	-	-	1-18:0	-	-	C14, C20, C22, C26	C28, C31	Cholesterol	-	-	0	0	0	0	0	0
60	AV2-060	Carinated kylix	Rim	Drinking/eating	Fine plain	West Stoa_Floor (Trench Δ11)_Group 7148	LH IIIB Middle (Middle 13th cent.)	neg.	C16:0, C18:1, C18:0	-	-	1-16:0, 2-18:1, 1-18:0	-	-	C14, C15, C16, C18, C20, C22	C20, C21, C32	Cholesterol	K31, K33	-
62	AV2-062	Carinated kylix	Wall sherd	Drinking/eating	Fine plain	West Stoa_Floor (Trench Δ11)_Group 7148	LH IIIB Middle (Middle 13th cent.)	neg.	C12:0, C14:0, C15:0, C16:1, C16:0, C18:0, C20:0	-	-	1-16:0, 2-18:1, 1-18:0	1,2-32:0, 1,3-32:0, 1,2-34:1, 1,3-34:1, 1,2-36:1, 1,3-36:1	48:1, 50:2	C14, C16, C18, C20, C26	C20, C22, C27	Cholesterol, β-sitosterol	K33	-	0	0	0	0	0	0
63	AV2-063	Deep bowl	Wall sherd	Drinking/eating	Fine painted	Above Court_Levelling layer (Δ13β) Group 1070	LH IIIC (Early 12th cent.)	neg.	C12:0, C13:0, C15:0, C16:0, C18:0,	-	-	1-16:0, 1-18:0	-	-	C12, C14, C15, C16, C17, C18, C20, C22, C24, C26, C28, C30	C25, C27, C28	Cholesterol, β-sitosterol	K31, K33	-	2.2	0	1.8	0.04	0	0	2.17391
64	AV2-064	Deep bowl	Rim	Drinking/eating	Fine painted	Above Court_Levelling layer (Δ13β) Group 1063	LH IIIC (Early 12th cent.)	neg.	C9:0, C12:0, C15:0, C16:0, C18:1, C18:0	-	-	1-16:0	-	-	C12, C14, C15, C16, C17, C18, C20	C18, C32	Cholesterol, β-sitosterol	K31	-
65	AV2-065	Deep bowl	Rim	Drinking/eating	Fine painted	Above Court_Levelling layer (Ε13δ) Group 1525	LH IIIC (Early 12th cent.)	5.5	C8:0, C9:0, C10:0, C12:0, C15:0br, C15:0, C16:1, C16:0, C17:0, C18:1, C18:0	Adipic (C6), Suberic (C8), Azelaic (C9)	-	1-16:0, 1-18:1, 1-18:0	1,2-30:0, 1,3-30:0, 1,2-32:0, 1,3-32:0, 1,2-34:1, 1,3-34:1	-	C12, C14, C15, C18, C20, C22	C18, C31	Cholesterol	K31, K33	-	0	0	0.005	0.001	0	0	16.6667
66	AV2-066	Deep bowl	Base	Drinking/eating	Fine painted	Above Court_Secondary layer (Δ12β) Group 1067 (DB65)	LH IIIB2/LH IIIC Early (Late 13th/Early 12th cent.)	neg.	C12:0, C14:0, C15:0br, C15:0, C16:0, C18:0, C20:0	Azelaic (C9)	-	1-16:0, 1-18:0	-	-	C14, C15, C16, C17, C18, C22, C26	C29	Cholesterol, β-sitosterol	K31, K33	-	0	0	0.2	0.5	0	0	71.4286
67	AV2-067	Semiglobular Cup (FS 215)	Rim	Drinking/eating	Fine painted	Above Court_Levelling layer (Δ13β) Group 1070	LH IIIC (Early 12th cent.)	neg.	C12:0, C13:0, C15:0br, C15:0, C16:0, C17:0, C18:1, C18:0,	-	-	1-16:0	-	-	C14, C15, C16, C17, C18, C20, C24, C26, C28	C28, C32	Cholesterol, β-sitosterol	K31, K33	-
68	AV2-068	Conical kylix	Rim	Drinking/eating	Fine plain	Above Court_secondary layer (Δ13β) Group 1073 (DB397)	LH IIIB2/LH IIIC Early (Late 13th/Early 12th cent.)	neg.	C10:0, C11:0, C12:0, C13:0, C15:0, C16:1, C16:0, C18:1, C18:0	-	-	1-16:0, 1-18:1, 1-18:0	1,2-32:0, 1,3-32:0, 1,2-34:1, 1,3-34:1	-	C12, C13, C14, C15, C16, C18, C20, C22, C26, C28	C20, C25, C32	Cholesterol, β-sitosterol	K31, K33	-
69	AV2-069	Goblet	Rim	Drinking/eating	Fine plain	Fill within Foundation Trench for construction of wall (Trench Γ14β)_Group 723 (DB376)	LH IIIA1/IIIA2 Early	10.3	C9:0, C10:0, C12:0, C13:0, C14:0, C15:0br, C15:0, C16:1, C16:0, C18:1, C18:0, C20:0, C24:0	-	-	1-16:0, 1-18:0	1,2-32:0, 1,3-32:0	-	C12, C14, C15, C18, C20, C21, C22	C29, C32	Cholestane-3,5,6-triol, (3β, 5α, 6β) Cholesterol, 7-Ketocholesterol	K31, K33	-	0	0	0	0	0	0
70	AV2-070	Amphora	Wall sherd	Storage	Medium coarse sand tempered (Cretan Import)	Fill within Foundation Platform (Trench Γ14β, TTII)_Group 977	LH IIIA2 Early	neg.	C8:0, C9:0, C12:0, C14:0, C15:0, C16:0, C18:1, C18:0, C20:0, C21:0, C22:0, C23:0, C24:0, C26:0, C27:0, C28:0	Adipic (C6), Pimelic (C7), Suberic (C8), Azelaic (C9)	9,10-Dihydroxyoctadecanoic acid	1-16:0, 1-18:1, 1-18:0	-	-	C14, C18, C26, C28	C20, C27, C29, C32, C33	Cholesterol	-	-	0	0	0.04	0	0	0	0
71	AV2-071	Krater	Rim	Mixing	Fine plain	SE Deposit (Trench Β15δ)_Group 763, 769 (DB442)	LH IIIA2 Middle (Middle 14th cent.)	neg.	C9:0, C12:0, C16:0, C18:0	-	-	1-16:0, 1-18:0	-	-	C12, C13, C14, C15, C16, C18, C20, C22	C20, C22, C30, C32	Cholesterol, β-sitosterol	-	-
72	AV2-072	Amphora	Wall sherd	Storage/serving	Medium coarse sand tempered (Cretan Import)	Fill within Foundation Trench for construction of wall (Trench Γ14β)_Group 721, 725 (DB447)	LH IIIA1/IIIA2 Early	14.2	C8:0, C9:0, C10:0, C11:0, C12:0, C14:0, C15:0br, C15:0, C16:0, C17:0, C18:1, C18:0, C19:0, C20:0, C22:0, C23:0, C24:0, C25:0, C26:0, C27:0, C28:0, C29:0, C30:0	Suberic (C8)	9,10-Dihydroxyoctadecanoic acid	1-16:0, 2-18:0, 1-18:0	-	-	C14, C15, C16, C18, C22, C24, C26, C28, C30, C32, C34	C21, C27, C29, C31, C32, C33	-	K31, K35	Palmitate: WE40, WE42, WE44, WE46, WE48	0.02	trace	0.2	0.05	0	0	20
7	AV-007S	Soil associated with the plain kylix	-	-	Soil	Building Β (Ι18α)_Road to the East of Room 6 Group 6247_lowest pebbled surface	-	neg.	C12:0, C15:0, C16:0, C18:0, C20:0, C22:0, C23:0, C24:0, C25:0, C26:0, C27:0, C28:0, C29:0, C31:0, C32:0	-	-	1-16:0	-	-	C24, C26, C28, C30	C18, C20, C21, C23, C25, C33	Cholestero, β-sitosterol	K31, K33, K35	-	0.02	0	0.1	0	0	0	0
74	AV2-74soil	Soil from stratigraphic context	-	-	Soil	SE Deposit (Trench Β15δ)_Group 733	-	5.2	C16:0, C17:0, C18:0, C20:0, C23:0, C24:0, C25:0, C26:0, C28:0, C30:0, C34:0	Suberic (C8)	-	1-14:0, 2-16:0, 1-16:0, 1-18:0	-	-	C12, C16, C18, C20, C22, C24, C26, C28, C30	C18, C20, C21, C22, C25, C27, C28, C31	Campesterol, Stigmasterol, β-sitosterol	-	-	1.0516	0	2.49941	0	0	0	0
76	AV2-76soil	Soil from stratigraphic context	-	-	Soil	West Stoa_Floor (Trench Δ11)_Group 7148	-	37.6	C9:0, C10:0, C11:0, C12:0, C13:0, C14:0, C15:0br, C15:0, C16:1, C16:0, C17:0, C18:1, C18:0, C19:0, C20:0, C21:0, C22:0, C23:0, C24:0, C25:0, C26:0, C27:0, C28:0, C29:0, C30:0, C32:0, C34:0	-	-	2-16:0, 1-16:0, 1-18:0	1,2-32:0, 1,3-32:0	-	C12, C13, C14, C15, C16, C17, C18, C22, C24, C26, C28, C30	C17, C18, C19, C20, C25, C27,C29	Cholesterol, Campesterol, Stigmasterol, β-sitosterol	-	-	0	0	0	0	0	0
77	AV2-77soil	Soil from stratigraphic context	-	-	Soil	SE Deposit (Trench Β15δ)_Group 763 and close to conical cup DB1528	-	27	C9:0, C10:0, C12:0, C14:0, C15:0, C16:0, C18:1, C18:0, C22:0, C24:0, C25:0, C26:0, C28:0, C30:0, C31:0, C32:0, C33:0, C34:0, C36:0	-	-	1-14:0, 2-16:0, 1-16:0, 1-18:0	1,2-30:0, 1,3-30:0, 1,2-32:0, 1,3-32:0, 1,2-34:1, 1,3-34:1, 1,2-34:0, 1,3-34:0, 1,2-36:0, 1,3-36:0	-	C12, C13, C14, C15, C16, C17, C18, C20, C22, C26, C28, C30, C32	C17, C18, C19, C20, C27, C29, C31	Cholesterol, Campesterol, Stigmasterol, β-sitosterol	K31	-	1.77681	0	5.12251	0.410012	0	0	7.41094
78	AV2-78soil	Soil from stratigraphic context	-	-	Soil	SE Deposit (Trench Β15δ)_Group 770	-	3	C14:0, C16:0, C18:0, C20:0, C21:0, C22:0, C23:0, C24:0, C25:0, C26:0, C28:0, C29:0, C30:0, C32:0	-	-	2-16:0, 1-16:0, 1-18:0	-	-	C16, C18, C20, C22, C26, C28, C30	C17, C18, C20, C21, C22, C25, C27, C28, C30	-	K31	-	0.27652	0.0311185	0.438685	0	0	0	0
